# Supplementary material for: Association of the CPT1A p.P479L Metabolic Gene Variant With Childhood Respiratory and Other Infectious Illness in Nunavut
Source: Front Pediatr. 2021 Jul 6;9:678553. doi: 10.3389/fped.2021.678553 (PMC8290072; doi:10.3389/fped.2021.678553)
Supplement: Supplementary file 2 [file Table_2.xlsx]

## Sheet: Sheet1
Supplementary Table 2: Senstivity Analysis - Impact of prior knowledge of CPT1A p.P479L homozygosity (CPT1_NBS_Pos) on model results
Original Results (in paper)						Exclude cases where CPT1_NBS_Pos=1 (n=140)							Includes CPT1_NBS_Pos variable (n=140)
	OR	p	95%CI Low	95%CI High			OR	p	95%CI Low	95%CI High	%Change			OR	p	95%CI Low	95%CI High	%Change
EARLY CHILDHOOD (0-5YRS)
LRTI Admit Model 1						LRTI Admit Model 1							LRTI Admit Model 1
Het	1.61612	0.107	0.900776	2.89956		Het	1.63902	0.097	0.913746	2.93999	-0.0141697		Het	1.61941	0.106	0.90239	2.90617	-0.00203512
Hmz	3.1916	0	1.81768	5.60401		Hmz	3.13157	0	1.78115	5.50585	0.0188072		Hmz	3.06325	0	1.74226	5.38583	0.0402134
LRTI Admit Model 2						LRTI Admit Model 2							LRTI Admit Model 2
Het	1.63389	0.169	0.812022	3.2876		Het	1.67037	0.15	0.830318	3.36033	-0.0223271		Het	1.63193	0.169	0.811576	3.28151	0.0012002
Hmz	2.87511	0.002	1.46436	5.64496		Hmz	2.88212	0.002	1.46577	5.66709	-0.00243921		Hmz	2.79729	0.003	1.42414	5.49442	0.0270689
RSV Admit Model 1						RSV Admit Model 1							RSV Admit Model 1
Het	3.06763	0.066	0.929056	10.1289		Het	3.10455	0.063	0.940459	10.2485	-0.0120376		Het	3.0687	0.066	0.929358	10.1327	-0.000350108
Hmz	4.16729	0.017	1.28932	13.4693		Hmz	4.2599	0.016	1.31649	13.7842	-0.0222231		Hmz	4.14703	0.018	1.28177	13.4173	0.00486216
RSV Admit Model 2						RSV Admit Model 2							RSV Admit Model 2
Het	2.6114	0.122	0.772919	8.82296		Het	2.60142	0.124	0.769859	8.79043	0.00382323		Het	2.61096	0.122	0.772775	8.82159	0.000170789
Hmz	3.04378	0.068	0.920265	10.0673		Hmz	3.0551	0.068	0.922459	10.1182	-0.00371708		Hmz	3.06885	0.066	0.927089	10.1585	-0.00823679
OM Model 1						OM Model 1							OM Model 1
Het	1.64086	0.036	1.03172	2.60963		Het	1.61534	0.043	1.01427	2.57262	0.0155486		Het	1.64027	0.037	1.03008	2.61193	0.000356521
Hmz	1.95146	0.004	1.24561	3.05728		Hmz	2.03838	0.002	1.29293	3.21362	-0.0445421		Hmz	2.11358	0.001	1.34216	3.32838	-0.083079
OM Model 2						OM Model 2							OM Model 2
Het	1.67343	0.081	0.938089	2.98518		Het	1.67127	0.082	0.936914	2.9812	0.00129315		Het	1.6726	0.082	0.937423	2.98434	0.000495988
Hmz	1.8334	0.034	1.04701	3.21041		Hmz	1.87467	0.029	1.06679	3.29433	-0.0225112		Hmz	1.90006	0.026	1.08171	3.33753	-0.036362
GE Model 1						GE Model 1							GE Model 1
Het	1.21356	0.344	0.8125	1.81259		Het	1.20094	0.372	0.803695	1.79455	0.0103967		Het	1.21176	0.348	0.811336	1.80982	0.00148159
Hmz	1.61571	0.015	1.09784	2.37788		Hmz	1.70832	0.007	1.1586	2.51889	-0.057319		Hmz	1.72247	0.006	1.16905	2.53787	-0.0660749
GE Model 2						GE Model 2							GE Model 2
Het	1.31622	0.264	0.812995	2.13094		Het	1.30311	0.282	0.804464	2.11085	0.00996031		Het	1.31529	0.265	0.812386	2.12951	0.000711125
Hmz	1.7396	0.02	1.09293	2.7689		Hmz	1.78842	0.015	1.12178	2.85121	-0.0280616		Hmz	1.79815	0.014	1.12865	2.86477	-0.0336548
Dental Model 1						Dental Model 1							Dental Model 1
Het	2.05836	0.004	1.25952	3.36386		Het	2.06025	0.004	1.26021	3.3682	-0.000918206		Het	2.05841	0.004	1.25956	3.36389	-2.08904e-05
Hmz	2.22526	0.001	1.38263	3.58144		Hmz	2.17691	0.001	1.35023	3.50973	0.0217282		Hmz	2.19674	0.001	1.36346	3.5393	0.012816
Dental Model 2						Dental Model 2							Dental Model 2
Het	1.88204	0.029	1.06839	3.31536		Het	1.89597	0.027	1.07599	3.34085	-0.00740046		Het	1.88367	0.028	1.06914	3.31874	-0.000861829
Hmz	2.11306	0.008	1.22099	3.65689		Hmz	2.05504	0.01	1.18573	3.56169	0.0274578		Hmz	2.05529	0.01	1.18641	3.56051	0.0273409
INFANCY (<1YR)						INFANCY (<1YR)							INFANCY (<1YR)
LRTI Admit Model 1						LRTI Admit Model 1							LRTI Admit Model 1
Het	1.6406	0.182	0.793439	3.39227		Het	1.65698	0.173	0.801494	3.42556	-0.00998295		Het	1.64168	0.181	0.793959	3.39451	-0.000657687
Hmz	3.27585	0.001	1.62981	6.58433		Hmz	3.20896	0.001	1.59412	6.45961	0.0204206		Hmz	3.16419	0.001	1.57242	6.36729	0.0340882
LRTI Admit Model 2						LRTI Admit Model 2							LRTI Admit Model 2
Het	1.54128	0.291	0.690013	3.44277		Het	1.54889	0.285	0.694043	3.45666	-0.00493744		Het	1.54117	0.291	0.689989	3.4424	7.20179e-05
Hmz	2.78698	0.009	1.28731	6.03371		Hmz	2.79151	0.009	1.28873	6.04666	-0.00162362		Hmz	2.78361	0.009	1.28448	6.03241	0.00120991
RSV Admit Model 1						RSV Admit Model 1							RSV Admit Model 1
Het	2.22652	0.193	0.667307	7.42895		Het	2.26488	0.183	0.678991	7.55484	-0.0172282		Het	2.22783	0.193	0.667681	7.4335	-0.000587015
Hmz	2.88558	0.077	0.890034	9.35538		Hmz	2.94593	0.072	0.906951	9.56892	-0.0209143		Hmz	2.84256	0.082	0.87541	9.23013	0.01491
RSV Admit Model 2						RSV Admit Model 2							RSV Admit Model 2
Het	1.78663	0.355	0.52235	6.1109		Het	1.78705	0.355	0.52252	6.11179	-0.00023508		Het	1.78661	0.355	0.522343	6.1109	7.27629e-06
Hmz	2.02408	0.249	0.610724	6.70826		Hmz	2.03378	0.246	0.612556	6.75248	-0.00479428		Hmz	2.02762	0.248	0.61106	6.72804	-0.00174894
OM Model 1						OM Model 1							OM Model 1
Het	1.41282	0.096	0.940913	2.12141		Het	1.4005	0.105	0.931937	2.10464	0.00872368		Het	1.41331	0.096	0.940777	2.12319	-0.000347532
Hmz	1.82755	0.003	1.23603	2.70213		Hmz	1.91531	0.001	1.29168	2.84001	-0.0480196		Hmz	1.93861	0.001	1.30837	2.87244	-0.0607711
OM Model 2						OM Model 2							OM Model 2
Het	1.52686	0.084	0.945408	2.46593		Het	1.51798	0.088	0.939734	2.45205	0.00581584		Het	1.52624	0.084	0.945076	2.46478	0.000409991
Hmz	1.86577	0.008	1.17528	2.96194		Hmz	1.90639	0.006	1.19876	3.03174	-0.021769		Hmz	1.91388	0.006	1.20415	3.04192	-0.0257829
GE Model 1						GE Model 1							GE Model 1
Het	1.60922	0.078	0.947264	2.73375		Het	1.60758	0.079	0.946002	2.73183	0.00101664		Het	1.60775	0.079	0.946404	2.73125	0.000910381
Hmz	2.00201	0.008	1.19947	3.34151		Hmz	2.0406	0.006	1.22097	3.41045	-0.0192777		Hmz	2.05351	0.006	1.22941	3.43002	-0.0257257
GE Model 2						GE Model 2							GE Model 2
Het	2.00732	0.037	1.04128	3.86961		Het	2.00375	0.038	1.03908	3.864	0.00177998		Het	2.00605	0.038	1.04053	3.8675	0.000633181
Hmz	2.31968	0.01	1.22605	4.38884		Hmz	2.33844	0.009	1.23458	4.42927	-0.00808516		Hmz	2.36177	0.008	1.24742	4.47158	-0.0181434
Model 1 covariates: community socioeconomic status (CWB) and residence in Iqaluit,
Model 2 covariates: community socioeconomic status (CWB) and residence in Iqaluit, sex, preterm birth (<37weeks gestation), major congenital anomalies (in LRTI and RSV admission models only), postnatal maternal smoking, breastfeeding ≥6months and food insecurity.
CPT1_NBS_Pos: prior positive test for p.P479L homozygosity, CPT1A: carnitine palmitoyltransferase 1A, Dental: major dental interventions (extractions, restorations, surgeries), CI: confidence interval, GE: gastroenteritis, Het: Heterozygous for p.P479L variant, Hmz: Homozygous for the p.P479L variant, LRTI: lower respiratory tract infection, OM: otits media, OR: odds ratio, RSV: Respiratory Syncy…
